# Supplementary material for: Estimating genetic kin relationships in prehistoric populations
Source: PubMed Central journal article supplement (PMC5912749; doi:10.1371/journal.pone.0195491), 2018-04-23

**A****All Relationships**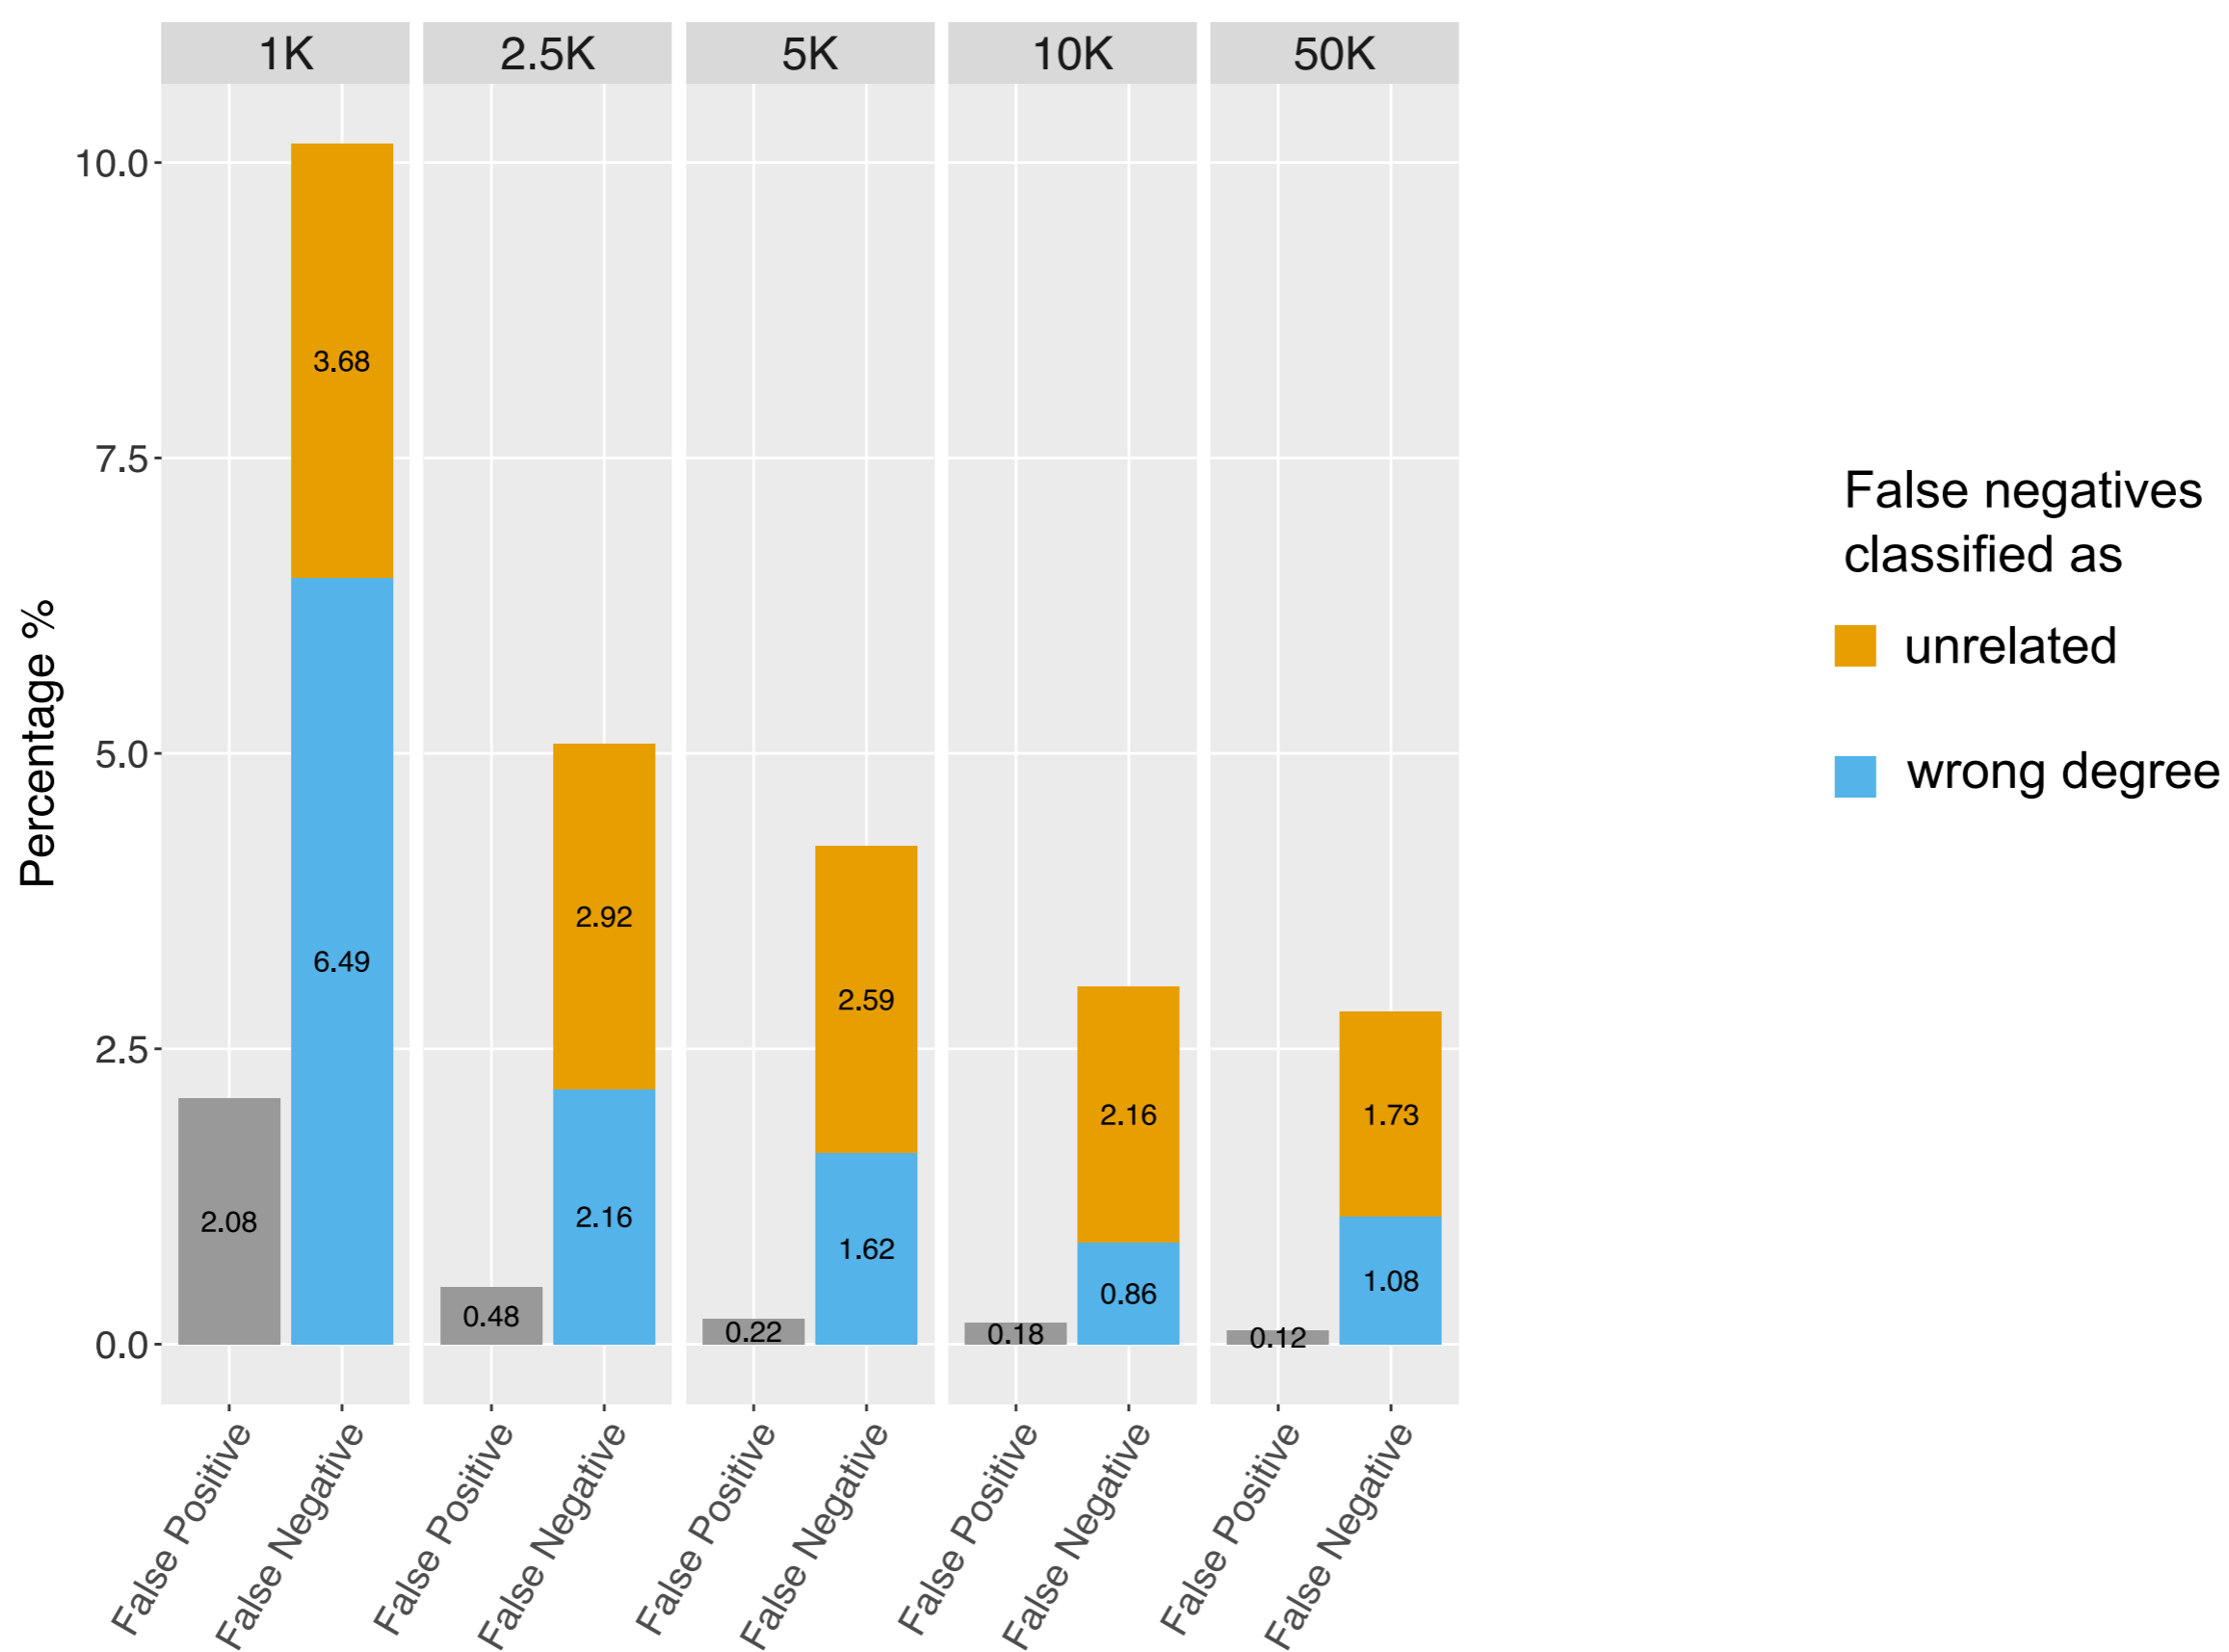**B****First Degree Only**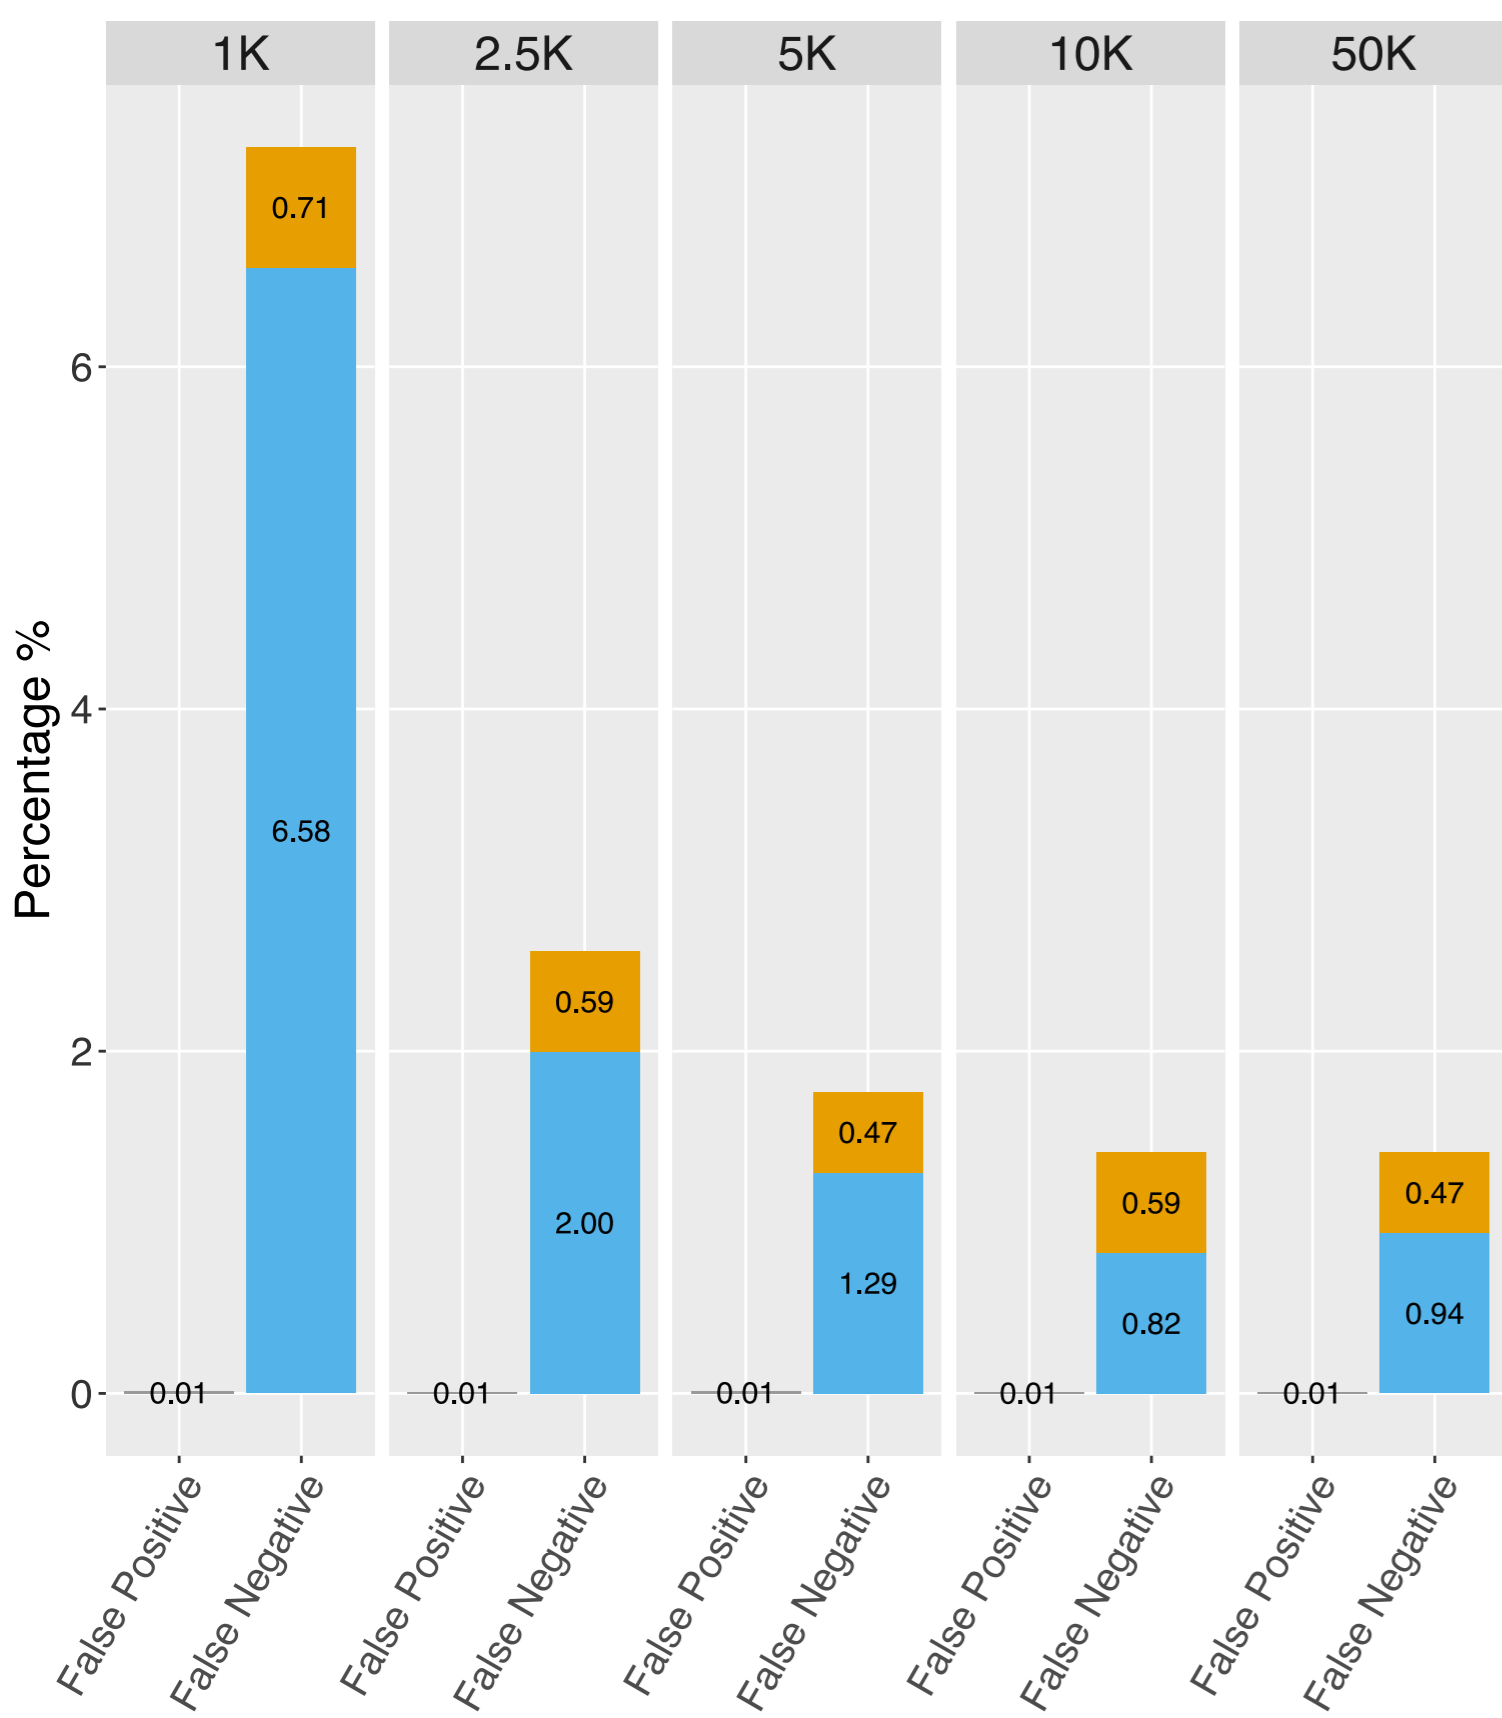**C****Second Degree Only**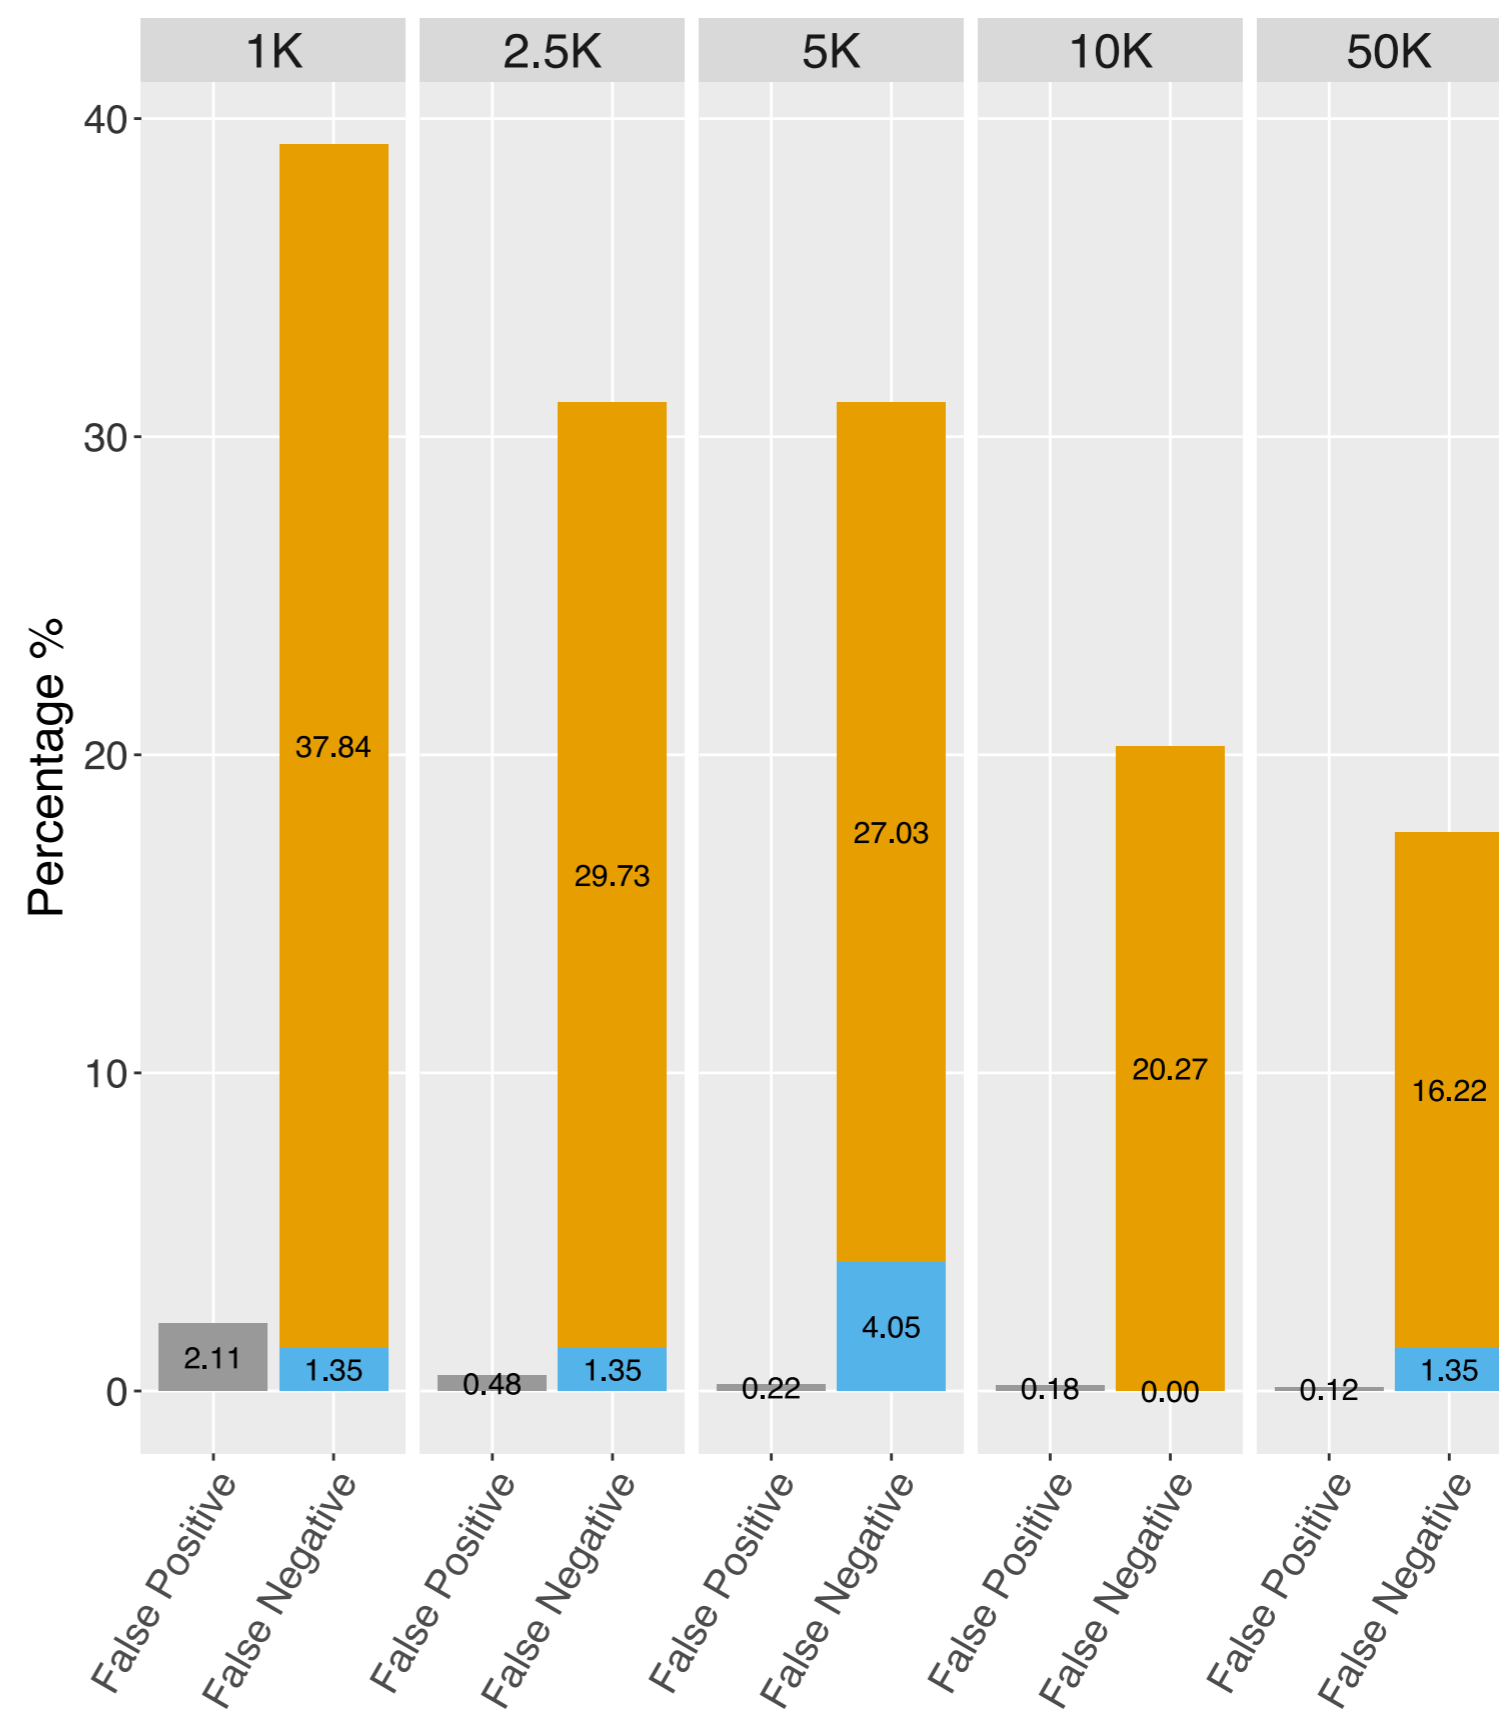

Supplement: pone.0195491.s001.pdf [file pone.0195491.s001.pdf]
