# Supplementary material for: Estimating genetic kin relationships in prehistoric populations
Source: PubMed Central journal article supplement (PMC5912749; doi:10.1371/journal.pone.0195491), 2018-04-23
Supplement: pone.0195491.s002.pdf [file pone.0195491.s002.pdf]

5% allelic error

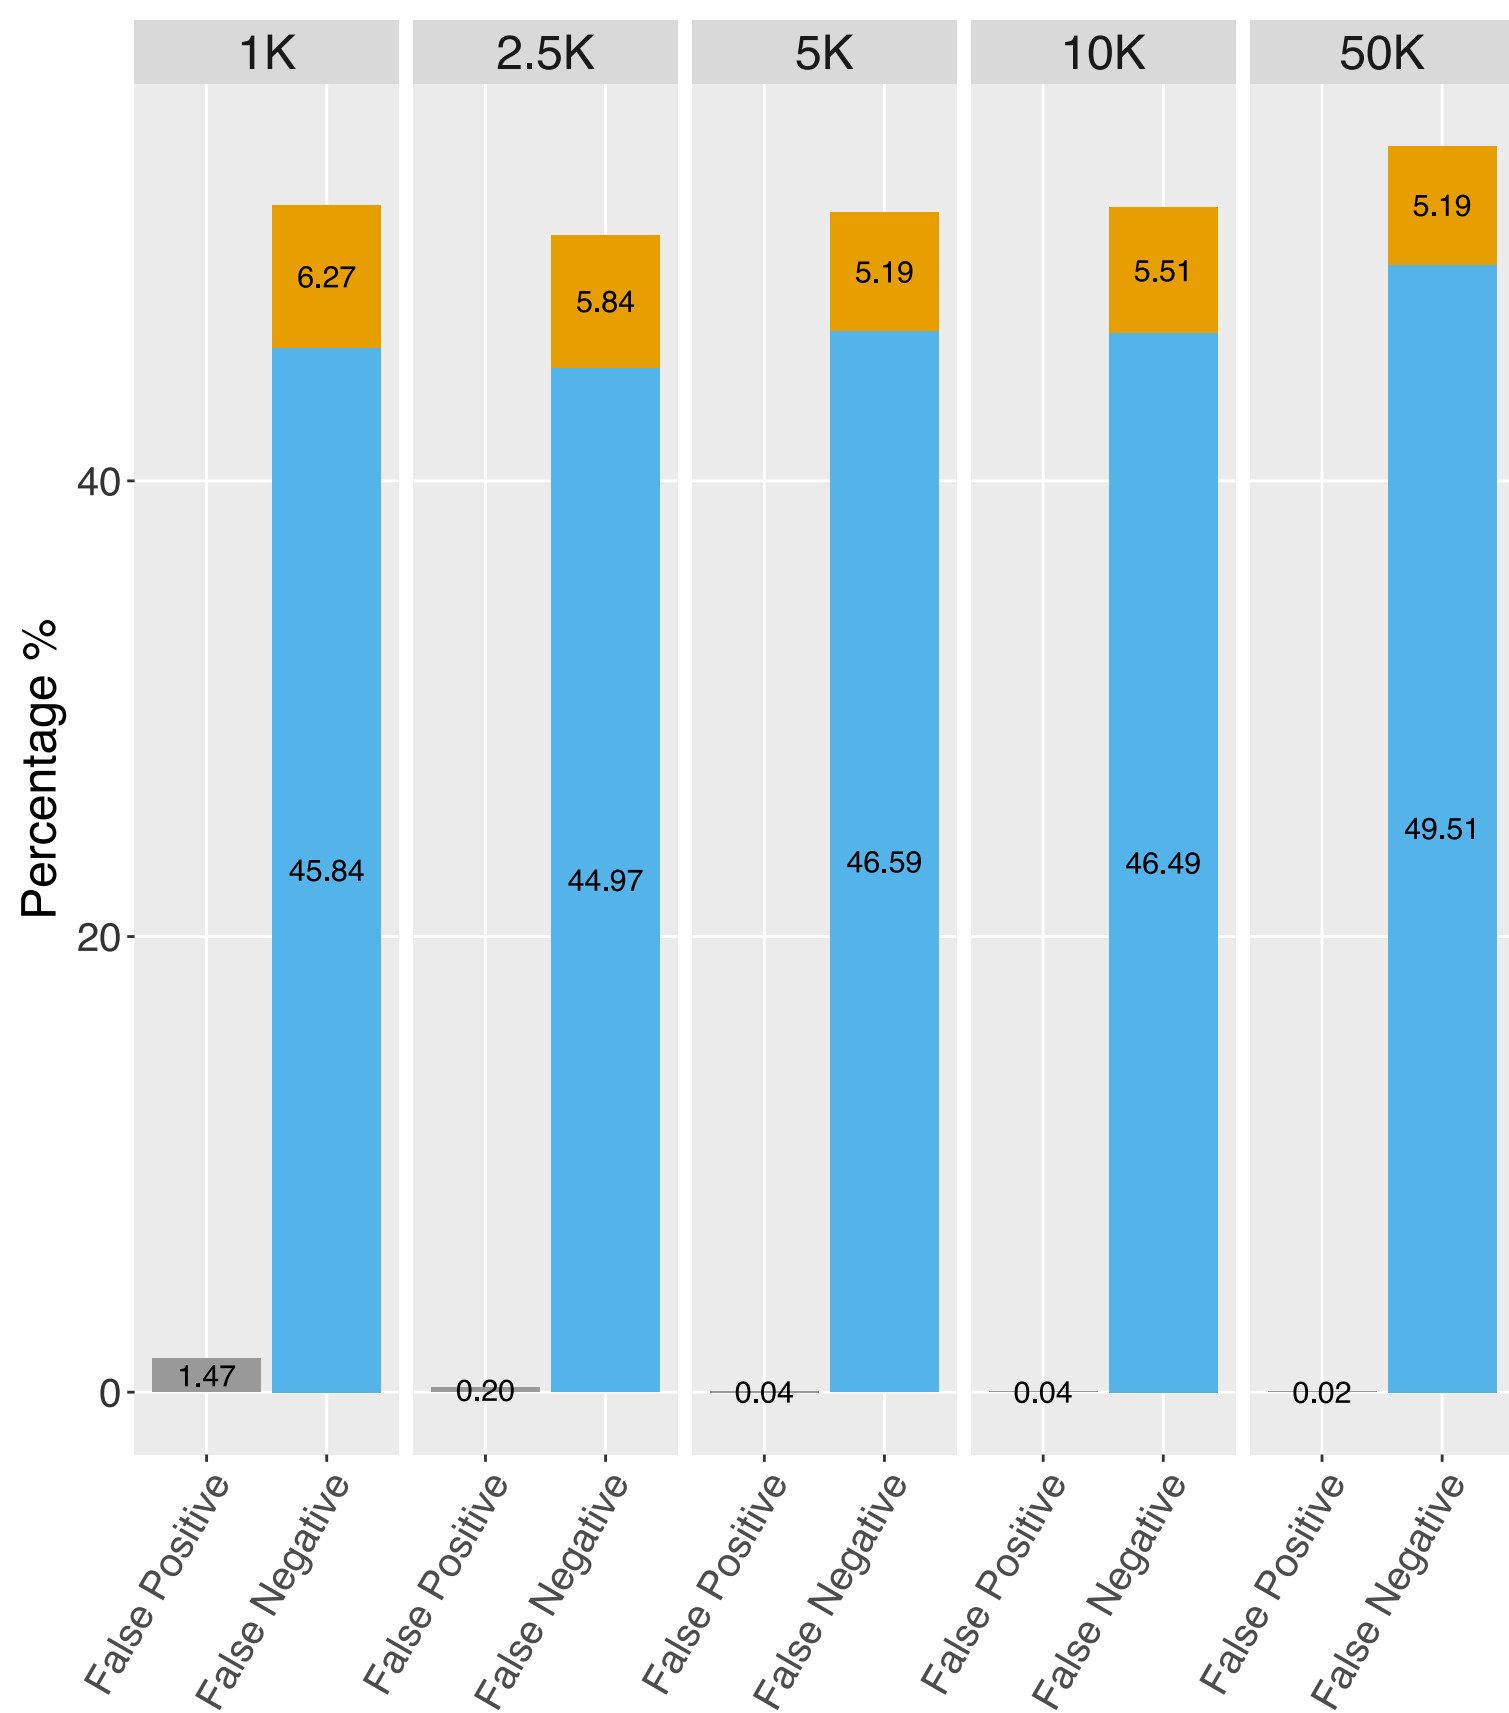

10% allelic error

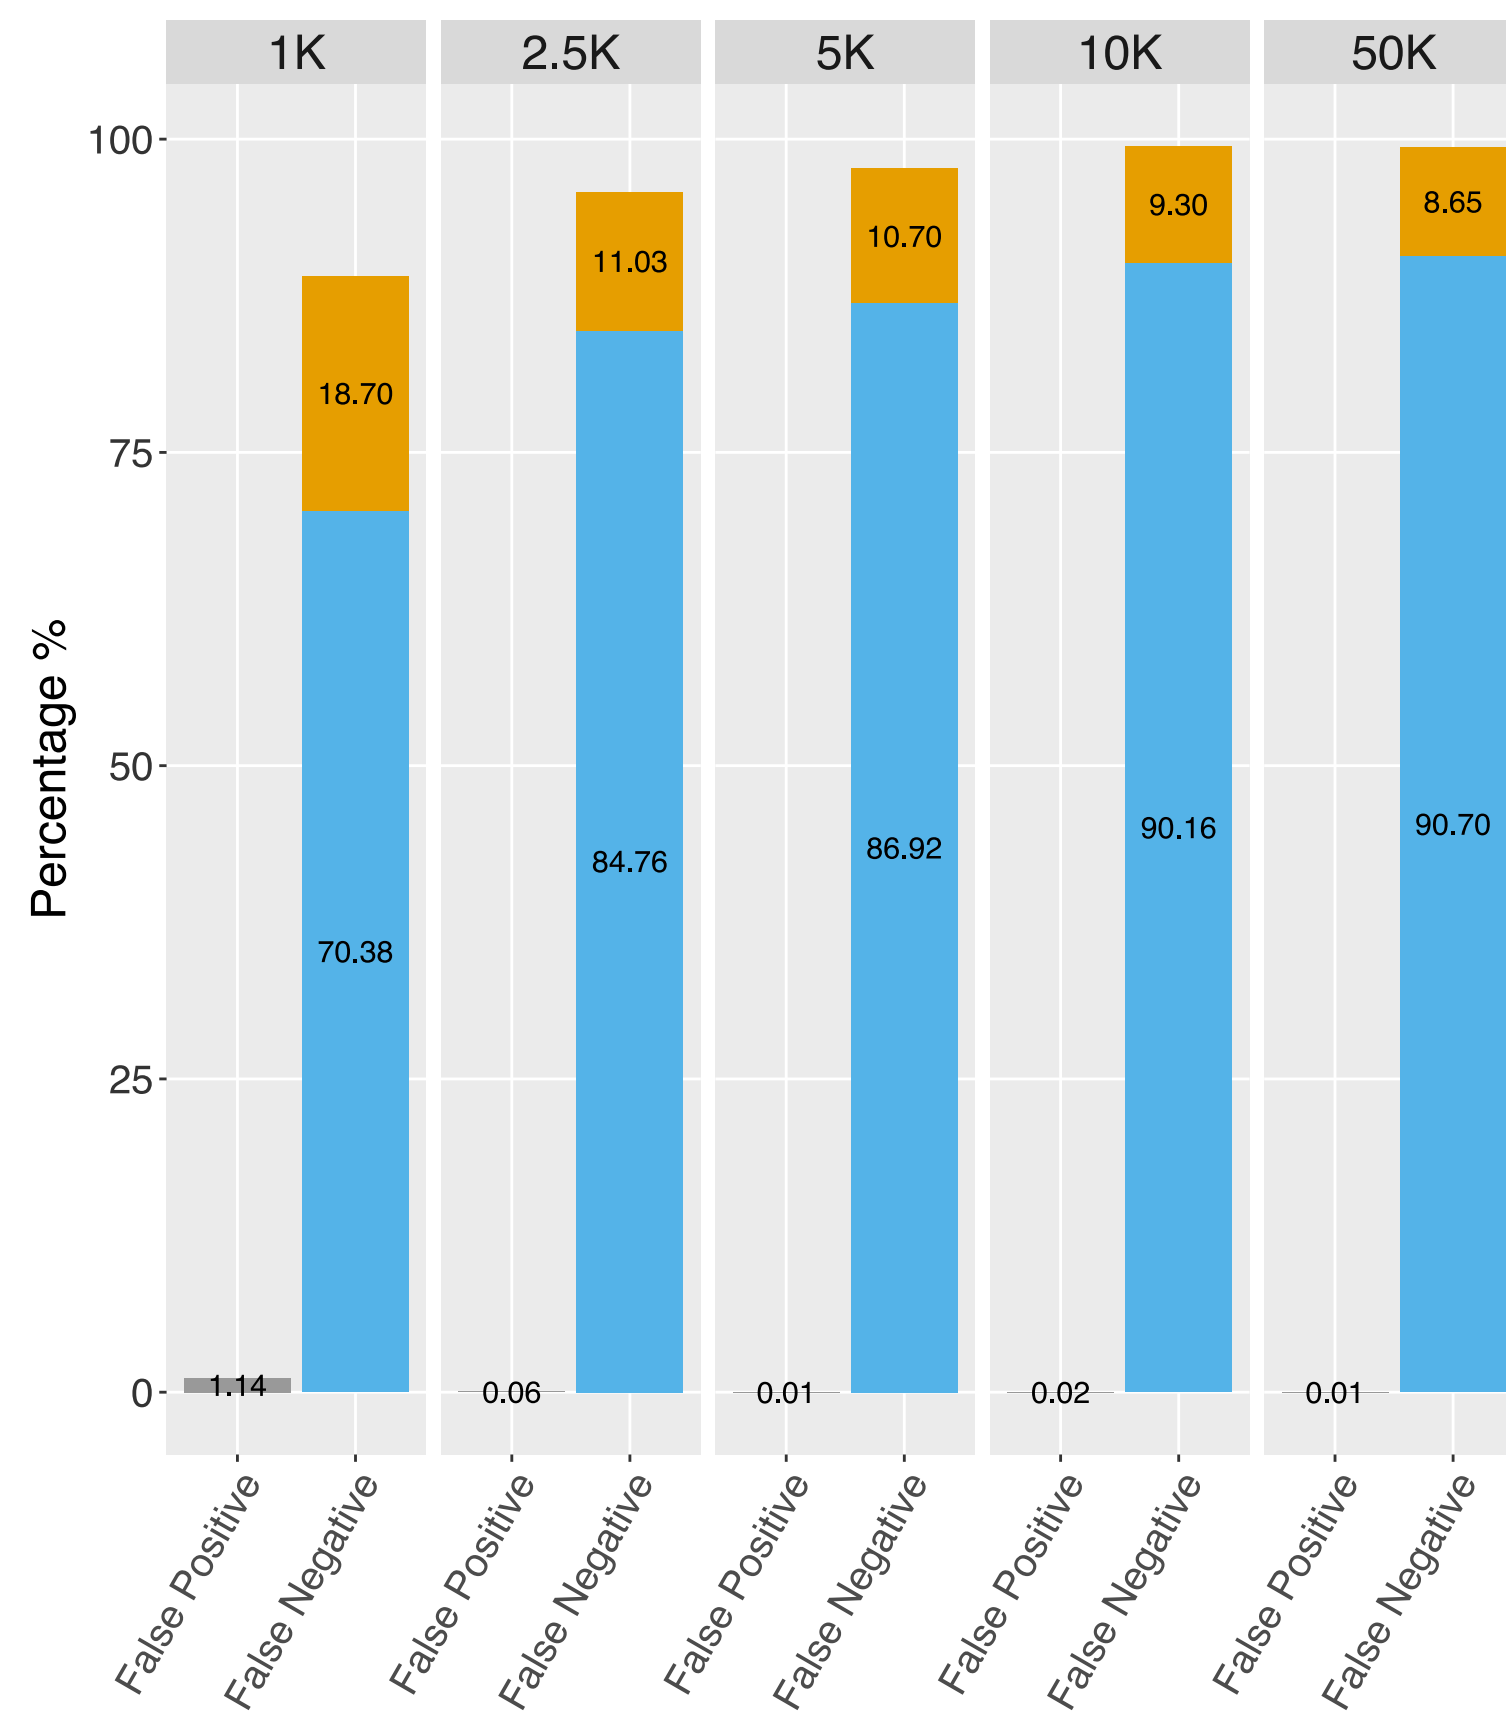

15% allelic error

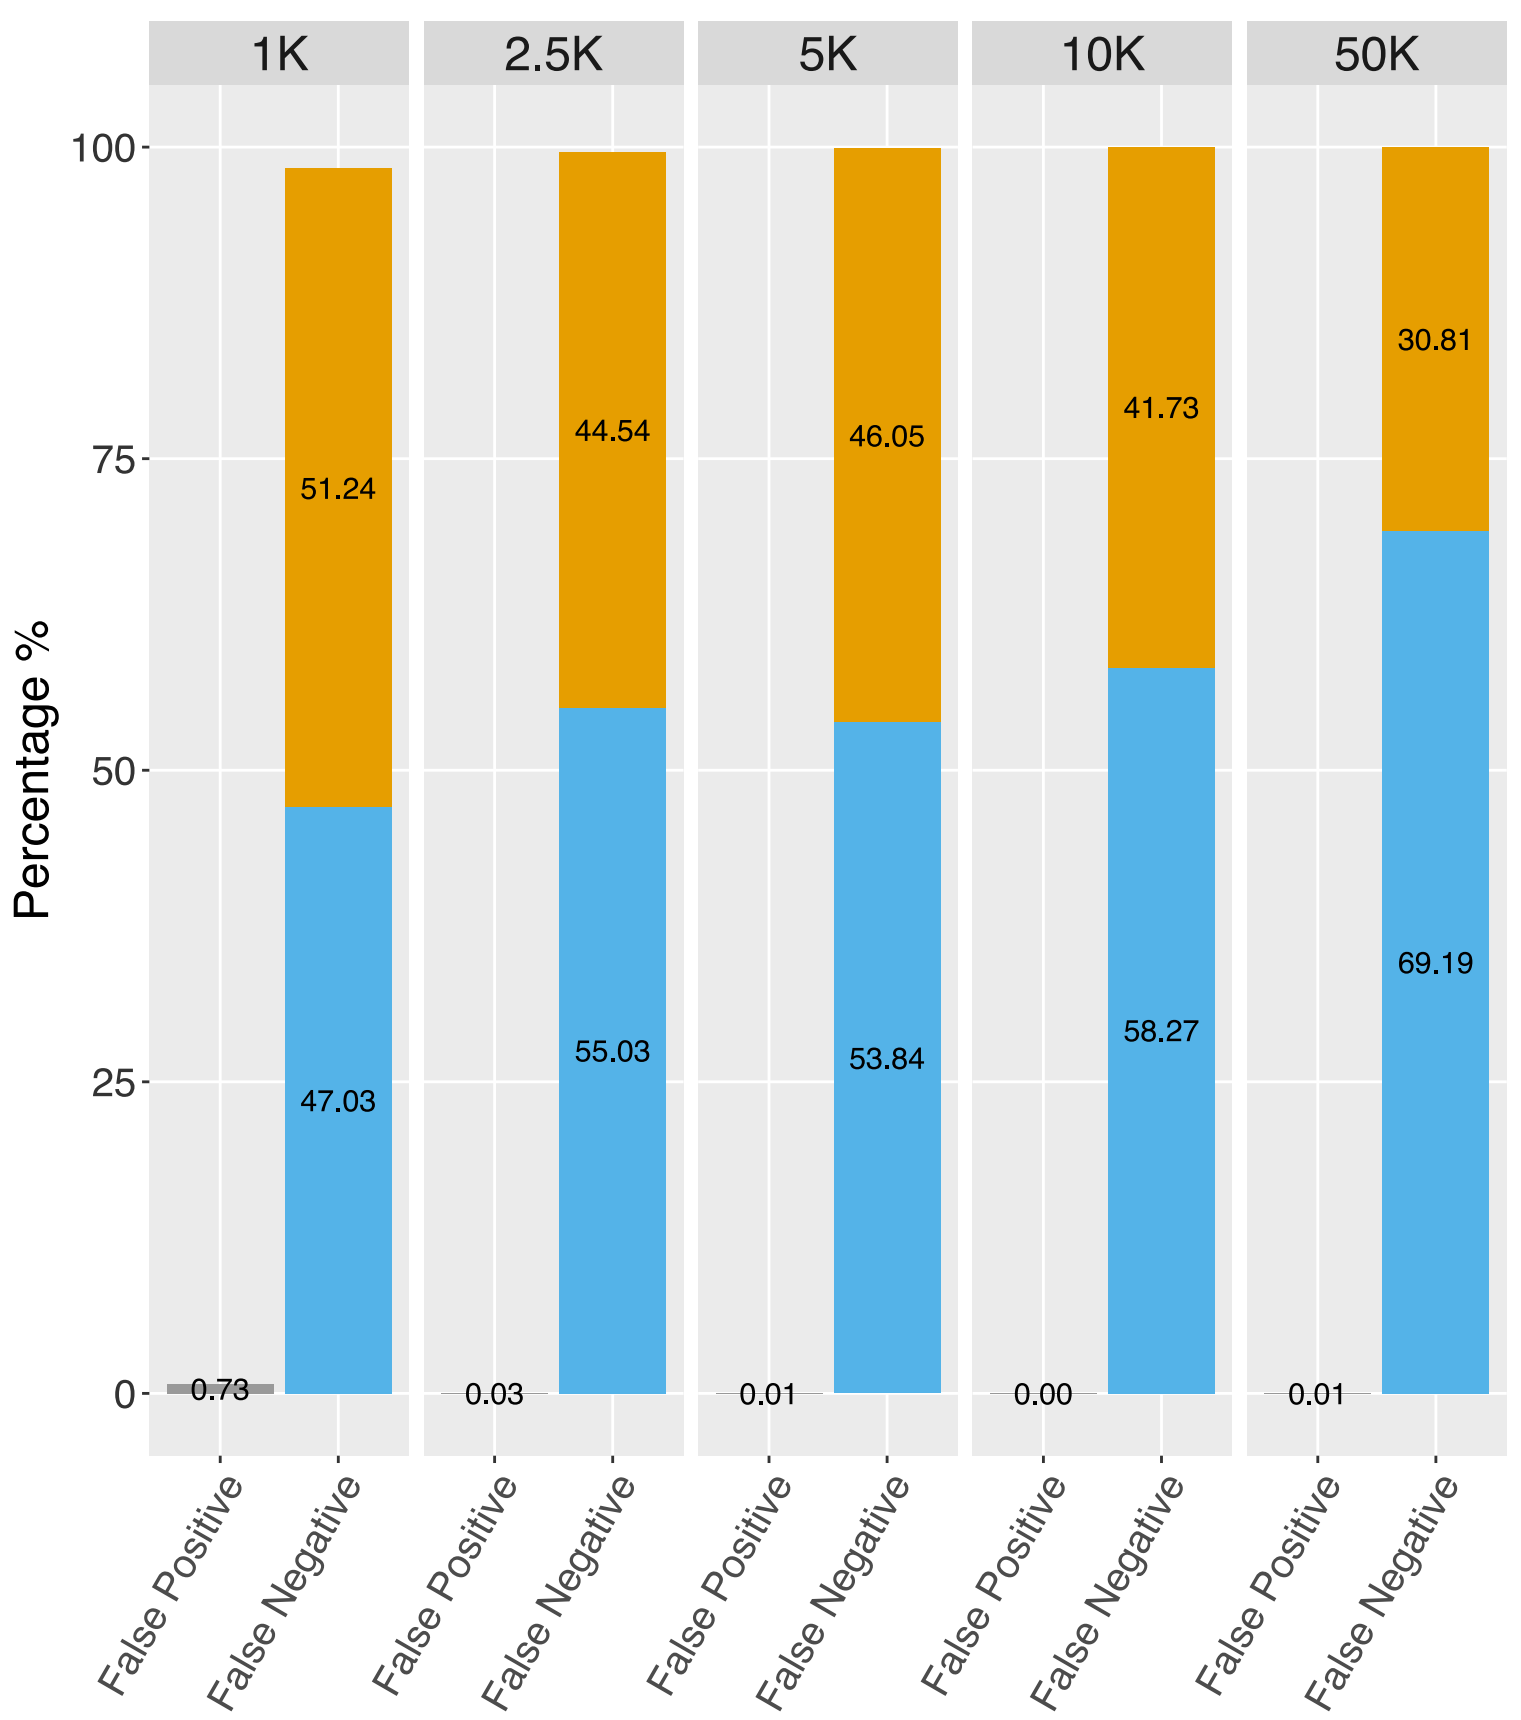

20% allelic error

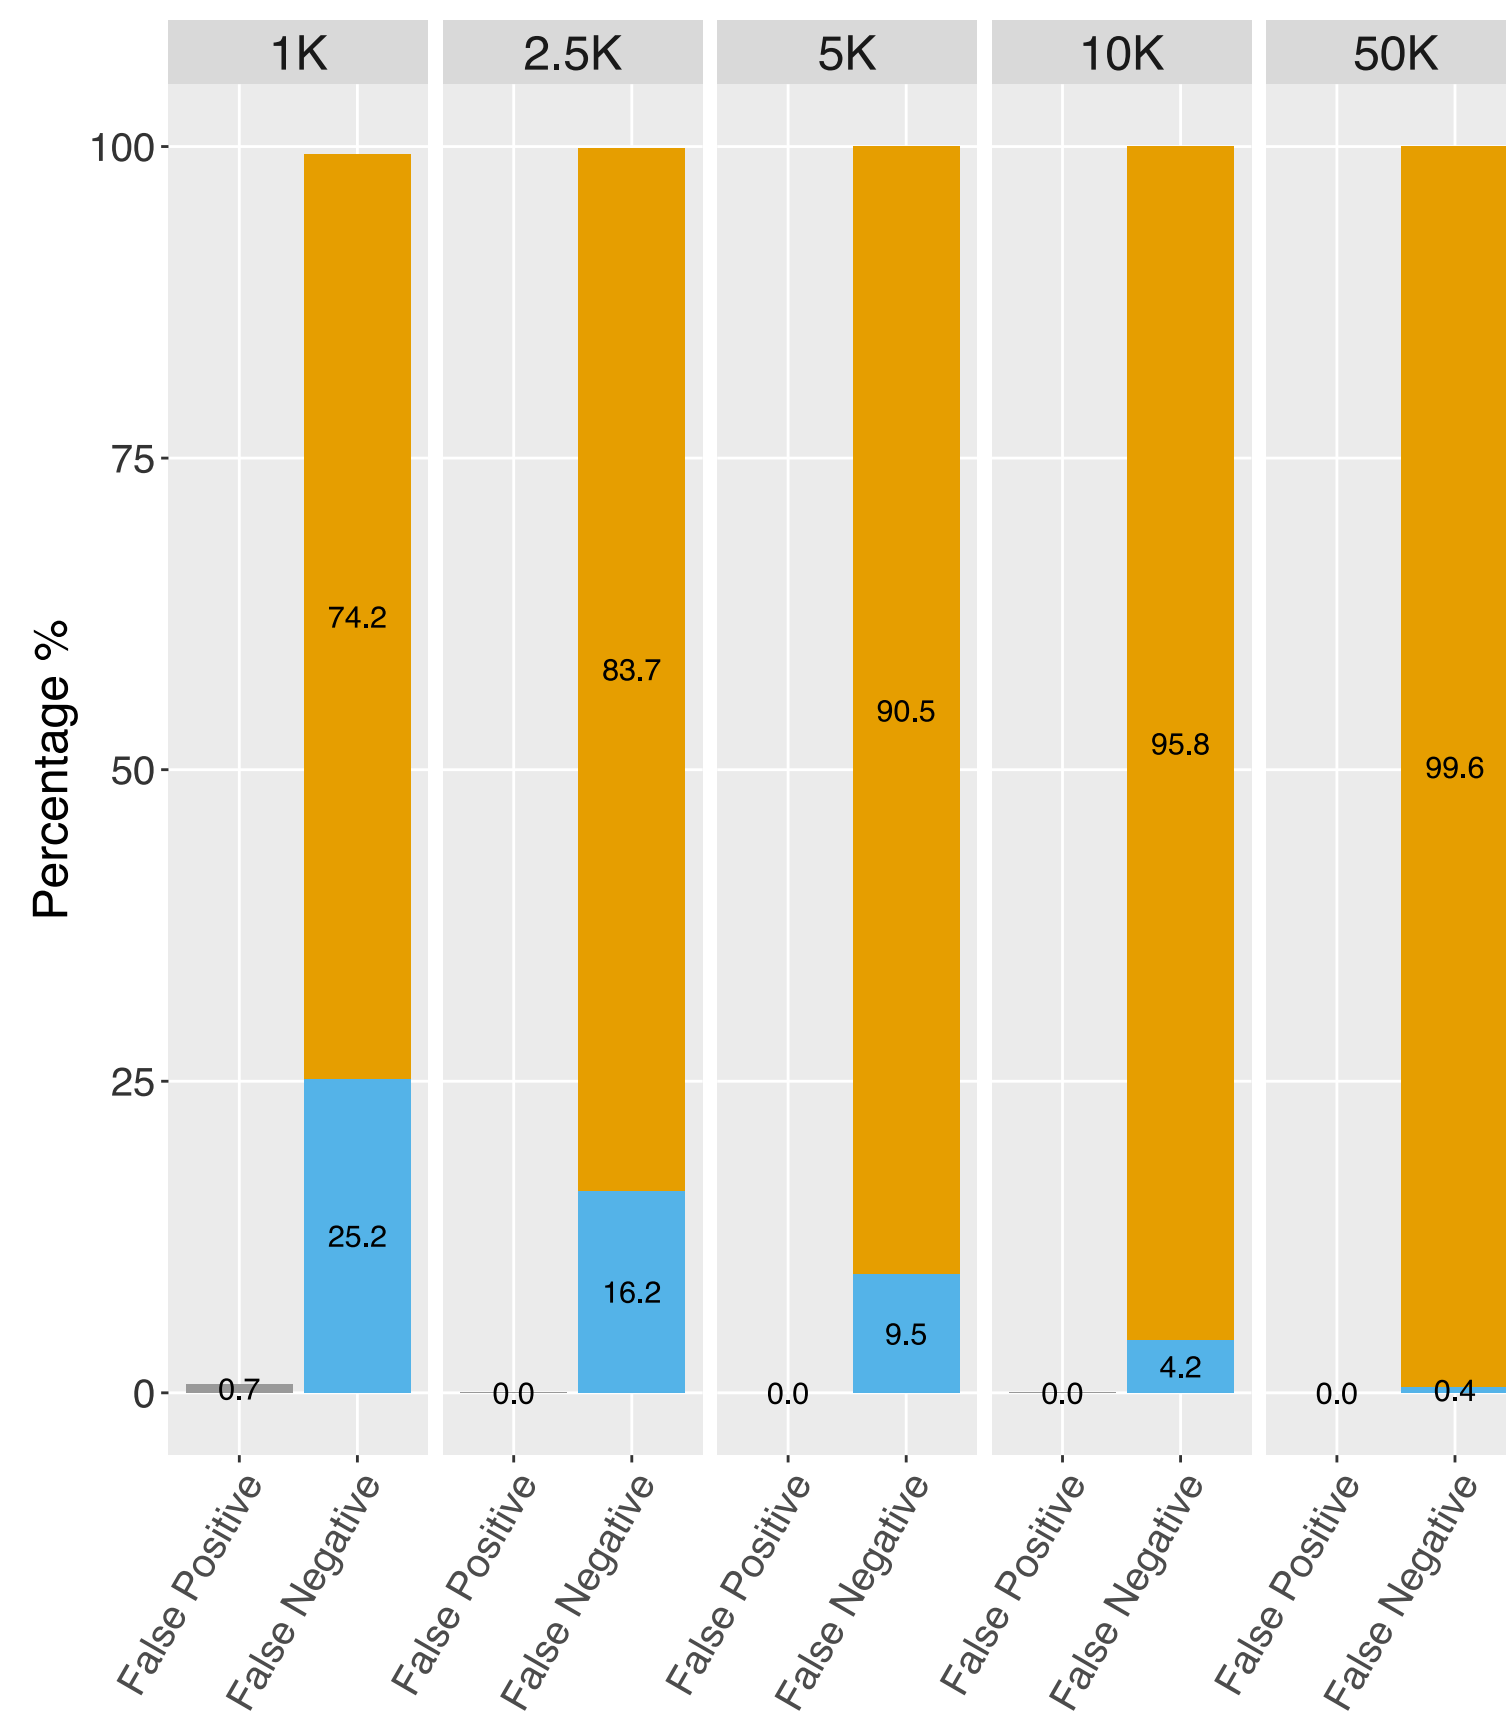

False negatives classified as

- unrelated
- wrong degree
